# Supplementary material for: A polymerization-induced gelation process visualized by nontraditional clustering-triggered emission
Source: Royal Society of Chemistry journal article supplement (doi:10.1039/d1py01651b), 2022-01-01
Supplement: d1py01651b2.pdf [file d1py01651b2.pdf]

## ***Supporting Information***

### **Polymerization-Induced Gelation process visualized by Nontraditional Clustering-Triggered Emission**

Liyang Zhao, Yuan Tian, Xiangnan Wang, Dingdong Liu, Yifan Xie, Jingang Hu\*  
and Gang Zou\*

#### **Author Affiliations**

Department of Polymer Science and Engineering, University of Science and Technology of  
China, 96 Jinzhai Road, Hefei 230026, China.

Corresponding author. Email: gangzou@ustc.edu.cn

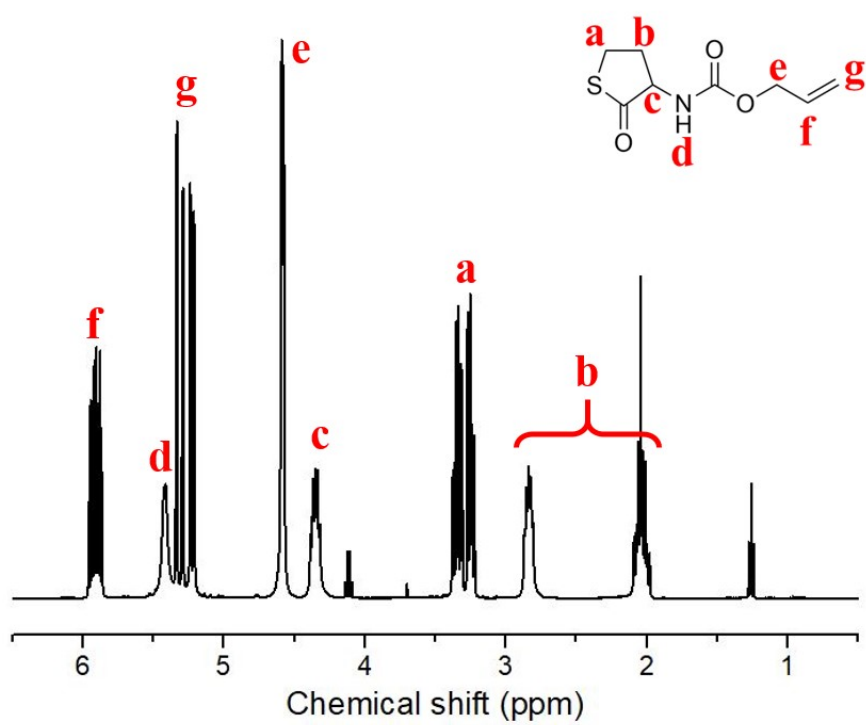

**Figure S1.**  $^1\text{H}$  NMR spectrum of NACHT.

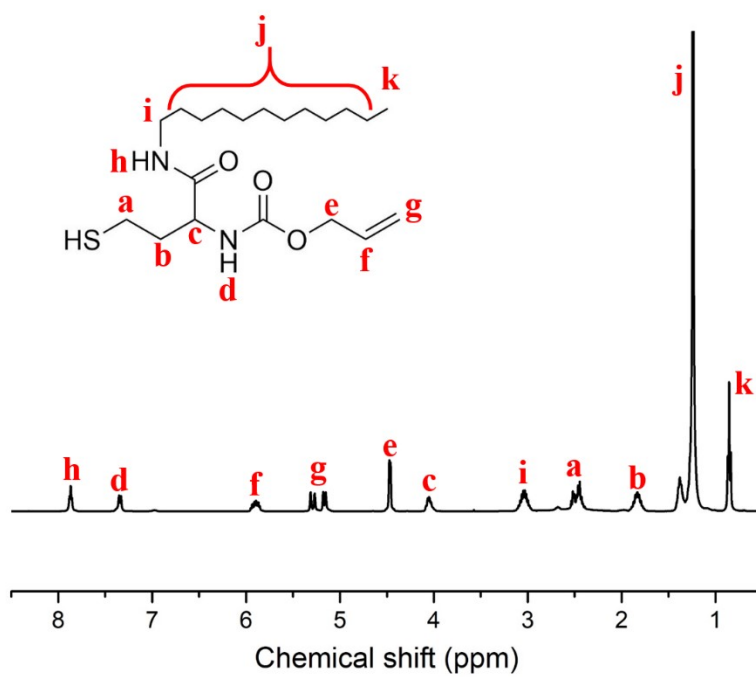

**Figure S2.**  $^1\text{H}$  NMR spectrum of monomer DMCAE.

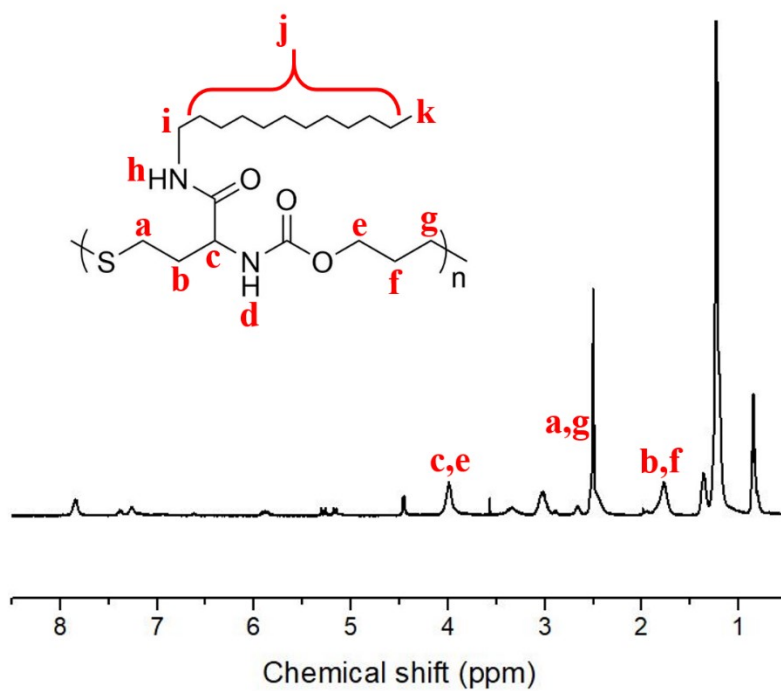

**Figure S3.**  $^1\text{H}$  NMR spectrum of poly(thioether).

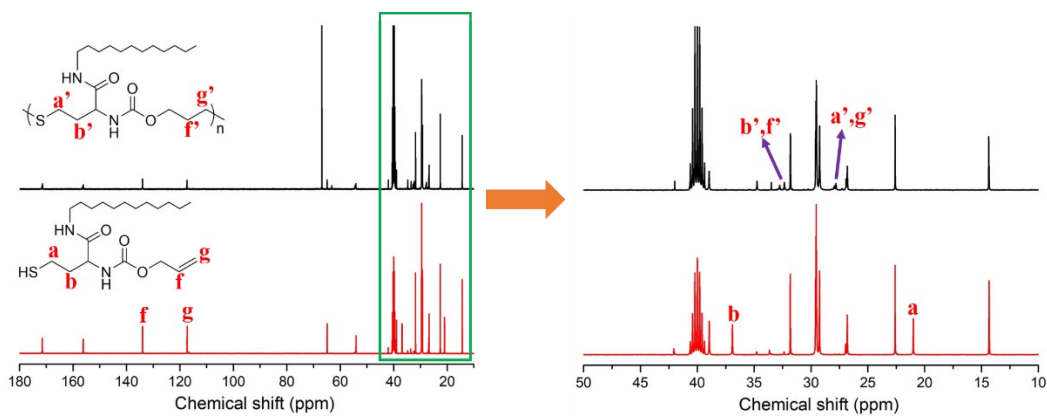

**Figure S4.**  $^{13}\text{C}$  NMR spectrum of DMCAE monomer and polymer. The green rectangular area is enlarged on the right column.

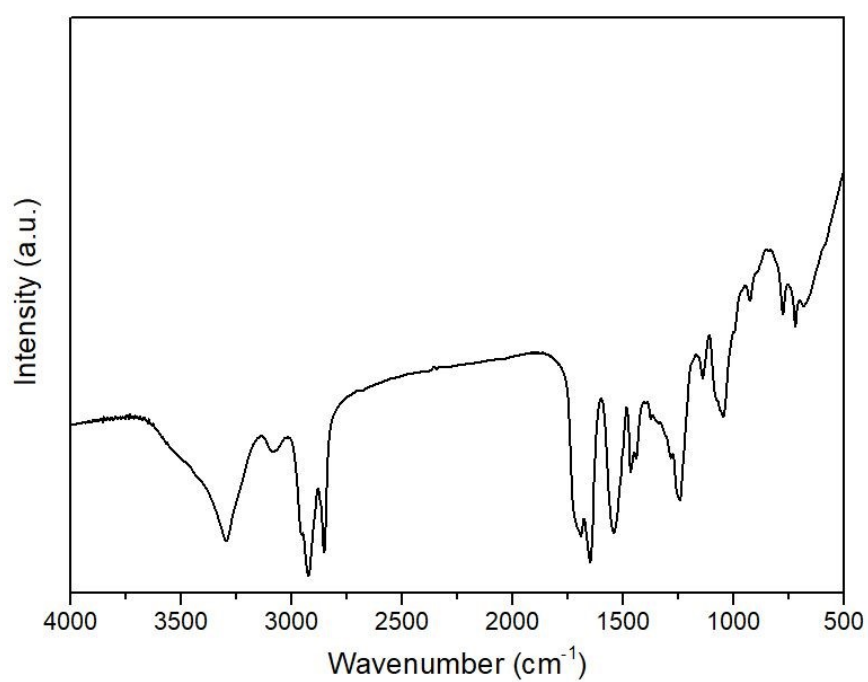

**Figure S5.** FT-IR spectrum of poly(thioether).

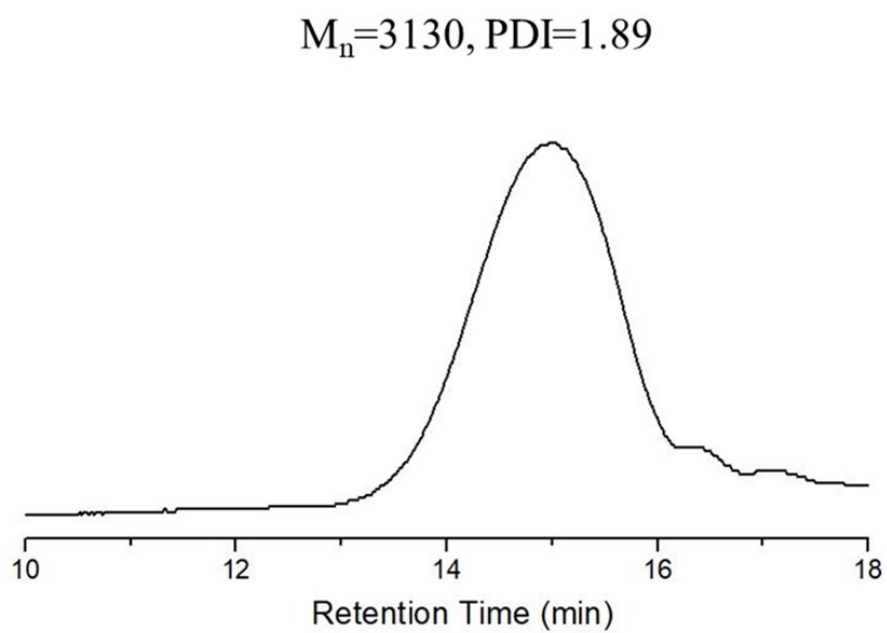

**Figure S6.** GPC trace of poly(thioether).

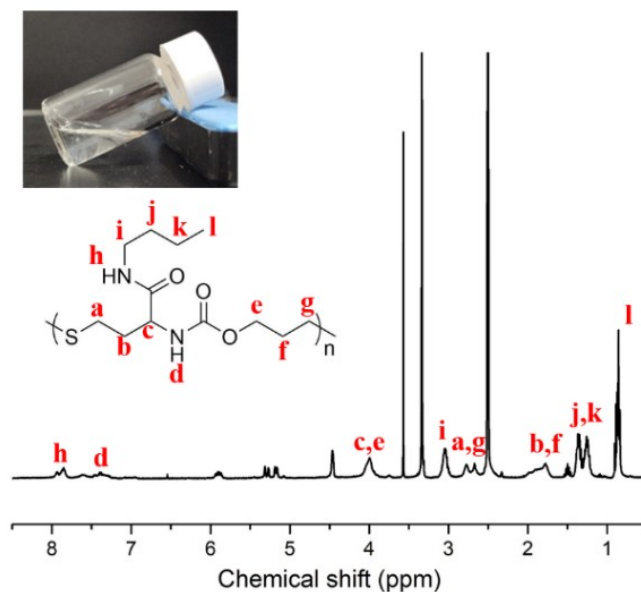

**Figure S7.**  $^1\text{H}$ -NMR spectrum of poly-(1-(butylcarbamoyl)-3-mercaptopropyl-carbamic acid allyl ester). The polymerization system remains solution instead of gel.

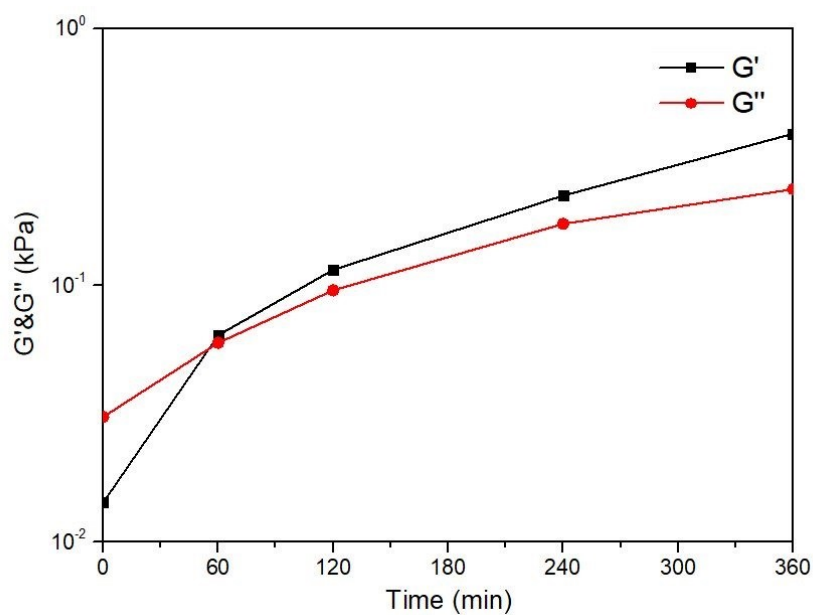

**Figure S8.** Time-dependent dynamic viscoelastic transformation of polymerization-induced gelation process.

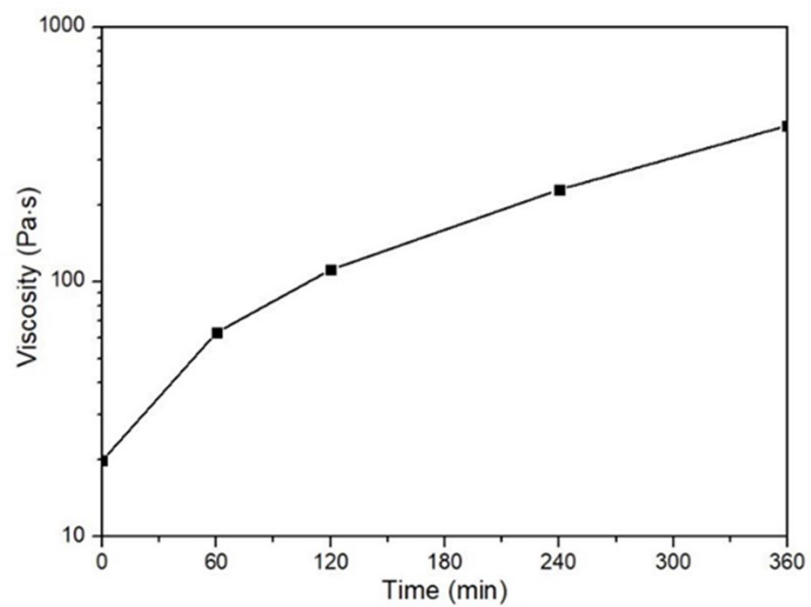

**Figure S9.** Time-dependent viscosity transformation of polymerization-induced gelation process.
